# Supplementary material for: Comparison of the clinical value of MRI and plasma markers for cognitive impairment in patients aged ≥75 years: a retrospective study
Source: PeerJ journal article supplement (doi:10.7717/peerj.15581), 2023-06-22
Supplement: main_figure_peerj-82393.pdf [file main_figure_peerj-82393.pdf]

Dementia has become the main cause of disability in older adults aged  $\geq 75$  years. Cerebral small vessel disease (CSVD) is a cause of vascular cognitive impairment (VCI).

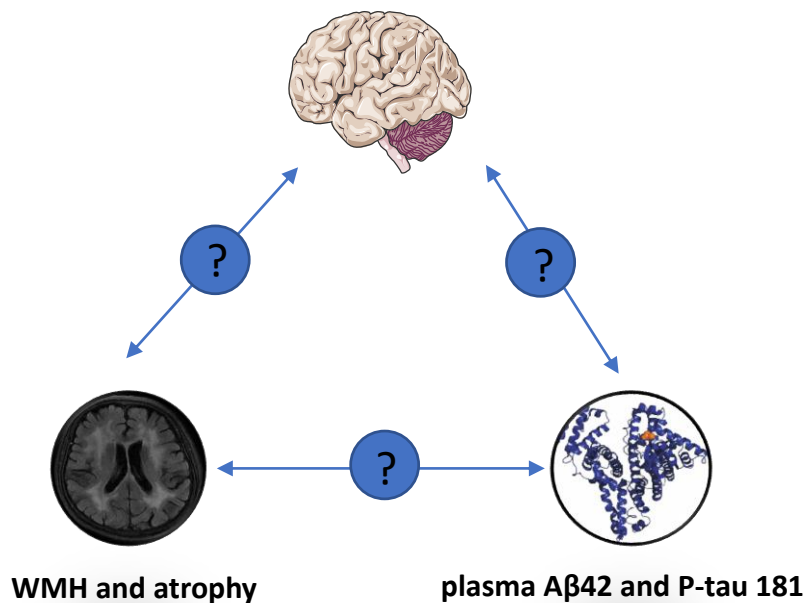

Plasma A $\beta$ 42 and p-tau181 are associated to multiple Alzheimer's disease-related cognitive domains. However, their relationship in CSVD is still unknown.

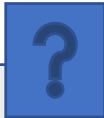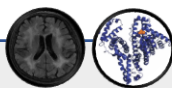

Cost-effective, non-invasive markers will be beneficial to clinical, scientific research and long-term follow-up. Do plasma A $\beta$ 42, p-tau181 and conventional MRI parameters have any clinical value in evaluating CI in patients aged  $\geq 75$  years?

Group

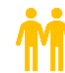

54 patients with CI

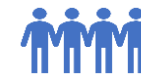

130 patients without CI

Measure

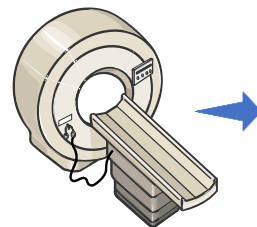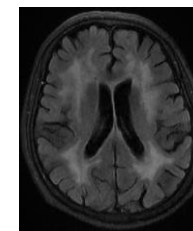

WMH

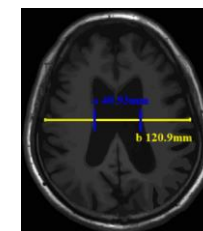

central atrophy

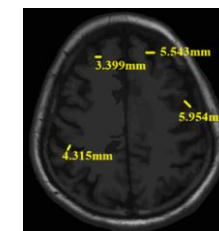

cortical atrophy

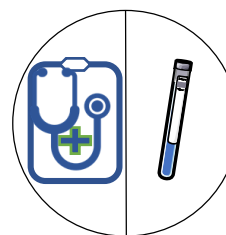

Clinical Variables including plasma A $\beta$ 42 and P-tau 181

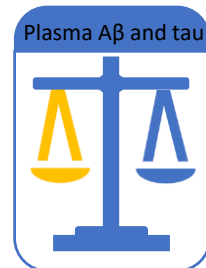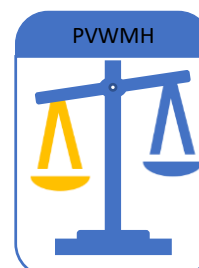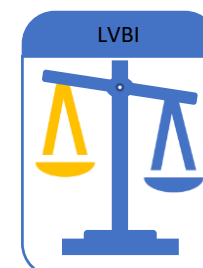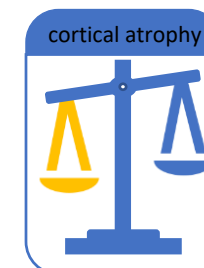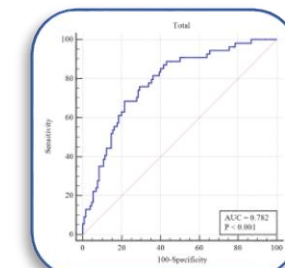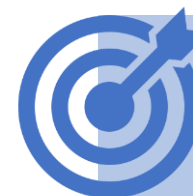

Conclusion: Plasma A $\beta$ 42 and P-tau181 might not be associated with CI, while MRI markers are related to CI.
